# Supplementary material
Source: publisher figshare collection journal article supplement (https://gsajournals.figshare.com/articles/dataset/_/8185955)
Supplement: Supplementary file 1 [file 2]

A.

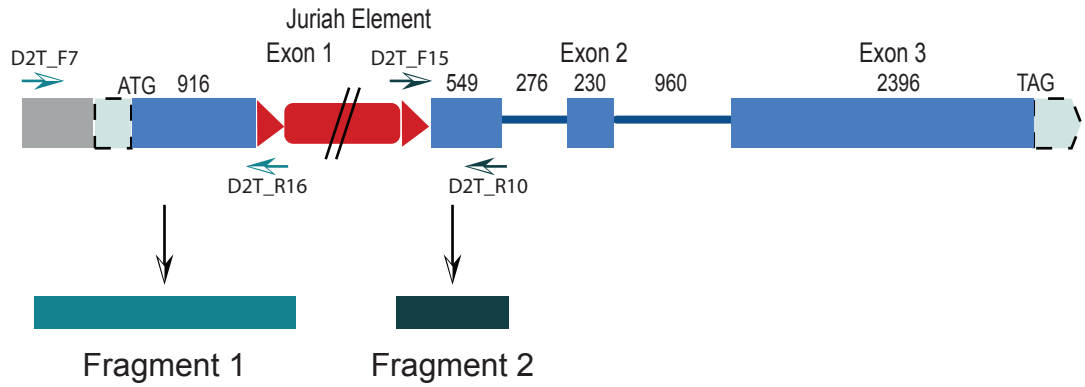

B.

*D2* coding sequence

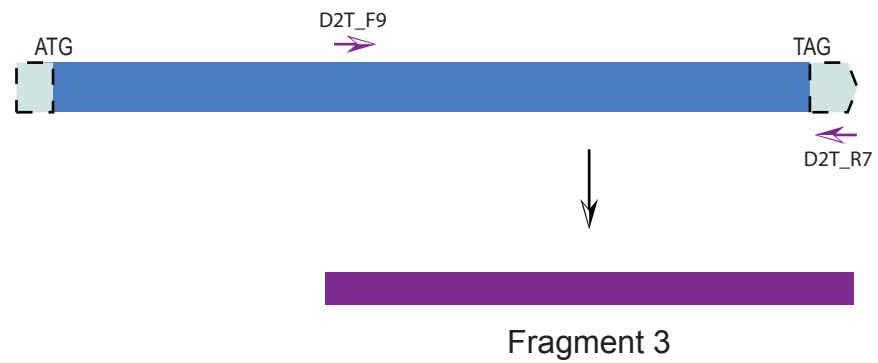

C.

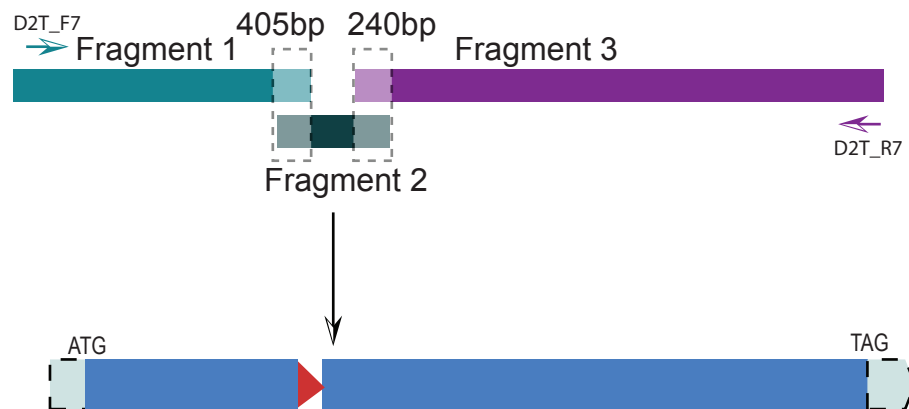

Figure S2. Schematic representation of overlap PCR in construct generation. A) Generation of fragment 1 and fragment 2 from the *d2* allele; B) Generation of fragment 3 from the *D2* allele; C) Fusion PCR to make the *d2* construct used in the transformation experiments.
