# Supplementary material
Source: publisher figshare collection journal article supplement (https://gsajournals.figshare.com/articles/dataset/_/8185955)
Supplement: Supplementary file 2 [file 2]

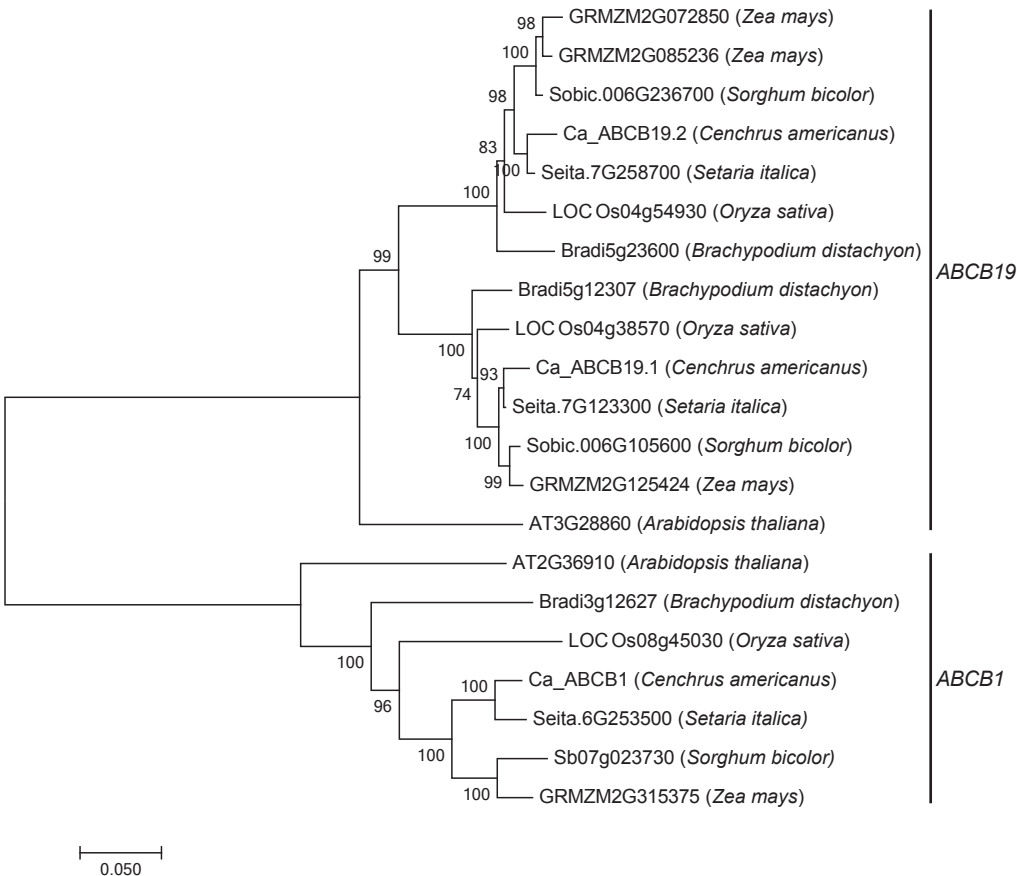

Figure S3. Neighbor joining tree of the ABCB1 and ABCB19 protein orthologs in sorghum (Sb), maize (GRMZM), pearl millet (Ca), foxtail millet (Seita), rice (LOC\_Os), *Brachypodium distachyon* (Bradi) and *Arabidopsis* (AT). The tree shows the expected phylogenetic placement of Ca\_ABCB1 in close relationship to *S. italica* ABCB1 (Seita.7G123300).
