# Supplementary material
Source: publisher figshare collection journal article supplement (https://gsajournals.figshare.com/articles/dataset/_/8185955)
Supplement: Supplementary file 3 [file 2]

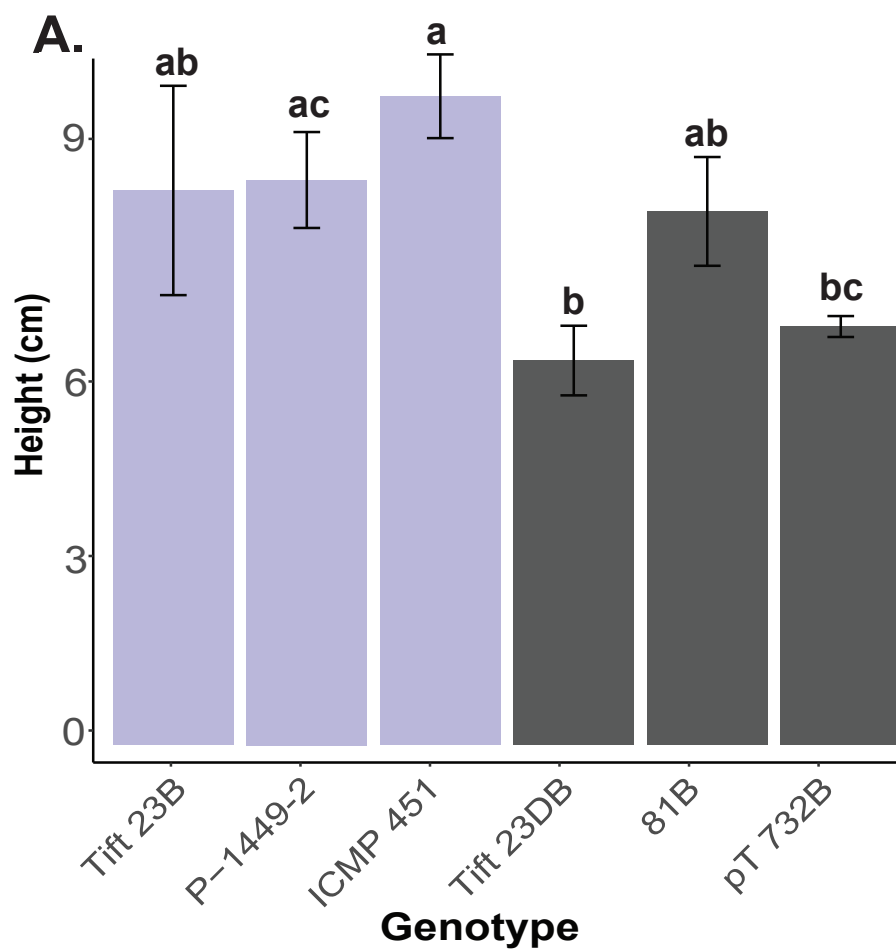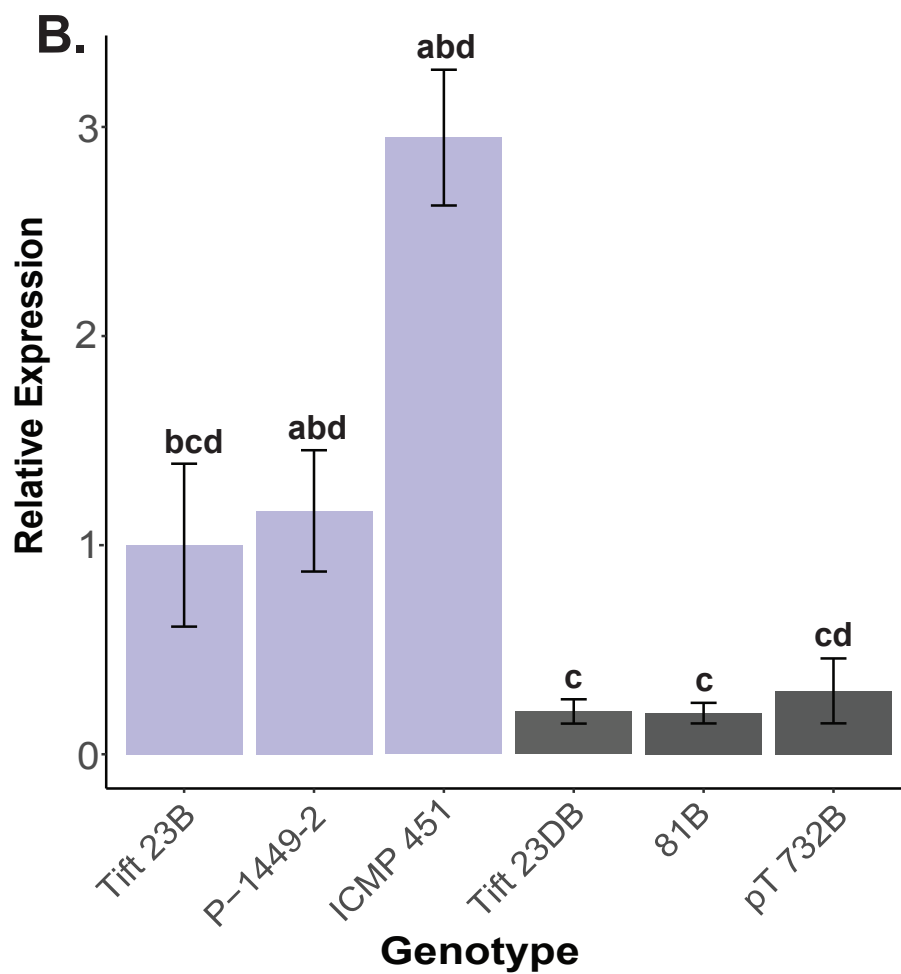

Figure S4. Graphs showing differences in A) seedling height at the 5-leaf stage and B) *ABCB1* transcript levels in seedling stems between Tift 23B, ICMP 451, P-1449-2, Tift 23DB, 81B and pT 732B. The different letters designate statistical differences between accessions at  $P < 0.05$ .
